# Supplementary material for: Carbon-nanotube reinforcement of DNA-silica nanocomposites yields programmable and cell-instructive biocoatings
Source: PubMed Central journal article supplement (PMC6892801; doi:10.1038/s41467-019-13381-1), 2019-12-04
Supplement: 41467_2019_13381_MOESM2_ESM.pdf [file 41467_2019_13381_MOESM2_ESM.pdf]

## **Description of Additional Supplementary Files**

**Supplementary Movie 1:** Life cell imaging of MCF7eGFP cells seeded on PLL surface. Life cell imaging was observed from 0 h to 24 h. Frame interval time: 36 min; frame rate: 5fps.

**Supplementary Movie 2:** Life cell imaging of MCF7eGFP cells seeded on dried SC50 surface. Life cell imaging was observed from 0 h to 24 h. Frame interval time: 36 min; frame rate: 5fps.

**Supplementary Movie 3:** Life cell imaging of MCF7eGFP cells adhered on fresh SC25 inside a microfluidic channel before and after treatment with restriction enzyme BstEII-HF. This movie starts at the image  $t = 0$ , shown in Figure 5c. Frame interval time: 10 min; frame rate: 5fps.
